# Supplementary material
Source: MDPI journal article supplement (https://www.mdpi.com/1424-8247/16/4/618)
Supplement: s1 [file s1]

Figure S1. Screening for candidate miRNAs by SBE reporter assays.

1. Through database survey, we picked up 18 miRNA candidates which potentially bind to and suppress the TGF- $\beta$  signal inhibitors, Smad 7, Smad 6, Smurf1, Smurf 2, TGIF, and LTBP1. 2. They were then narrowed to 13 miRNAs with respect to identity of miRNAs between mouse and human species for the ultimate purpose of clinical application. 3. Using HEK293 cells we measured SBE activity which reflects TGF- $\beta$ /Smad signal pathway through two round reporter assays; the first reporter assay was performed using a HEK293 where SBE reporter plasmid was initially transduced. 4. In the second reporter assay, we employed a dual luciferase assay system in which SBE activity is normalized by expression of co-transfected Renilla luciferase vector, thus providing more accurate data. Among them, 3 miRNAs (miR-497a-5p, -195a-5p, -186-5p) were eventually selected as the key factors which activated the TGF  $\beta$ /Smad signal pathway.

**1. Search for candidate mmu miRNAs by Target Scan and miRbase**

18 miRNAs which potentially bind and suppress TGF- $\beta$  signal inhibitors (SMAD6, SMAD7, Smurf1, Smurf2, LTBP1, TGIF)

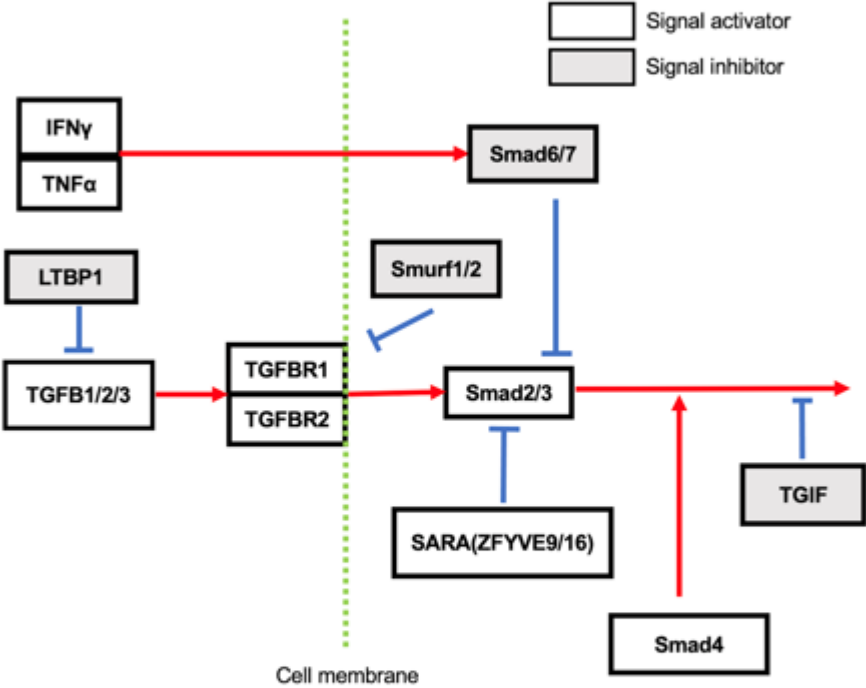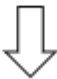

**2. Conserved miRNA sequences in human**

13 miRNAs retain identical sequences between mouse and human.

**3. 1<sup>st</sup> - round screening:** 9 miRNAs were selected

HEK293 cells used, where SMAD binding element (SBE) reporter plasmid is initially transduced (BPS Bioscience, Cat. No. 60653).

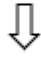

**4. 2<sup>nd</sup> - round screening:** 3 miRNAs remained.

HEK293 was transfected by SBE reporter ((BPS Bioscience, Cat. No. 60654) together with Renilla luciferase vector for normalization of transfection efficiency.
