# Supplementary material
Source: MDPI journal article supplement (https://www.mdpi.com/1424-8247/16/4/618)
Supplement: s1 [file s1]

Supplementary Figure S3. Sequence of mmu-miR-497a-5p and has-miR-497-5p

TargetScan was used to identify a binding site at position of the Smad 7 mRNA 3' UTR that was complementary to the identical seed sequence of mmu-miR-497a-5p and hsa miR-497-5p. Note that hsa-miR-497-5p possesses two binding portions in the human Smad 7 mRNA 3' UTR.

#### Mouse

Position 69-76 of Smad7 3' UTR    5' ACCGUUCAAACUACUUGCUGCUA '3

mmu-miRNA-497a-5p    3' UGUUUGGUGUCACACGACGAC '5

#### Human

Position 55-62 of Smad7 3' UTR    5' CACUUCAAACUACUU---UGCUGCUA '3

hsa-miRNA-497-5p    3' UGUUUGGUGUCACACGACGAC '5
