# Supplementary material
Source: MDPI journal article supplement (https://www.mdpi.com/1424-8247/16/4/618)
Supplement: s1 [file s1]

Supplementary Figure S4. HE staining of 1.5% DSS induced colitis mice

1.5% DSS was administered orally in drinking water to mice for 5 days. Mice were sacrificed on day 5. Strong inflammation was already observed in mucosa of rectum and distal colon. Scale bar: 100  $\mu$ m

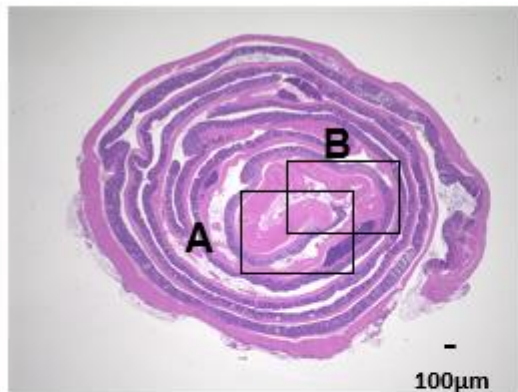

DSS1.5% day 5

A

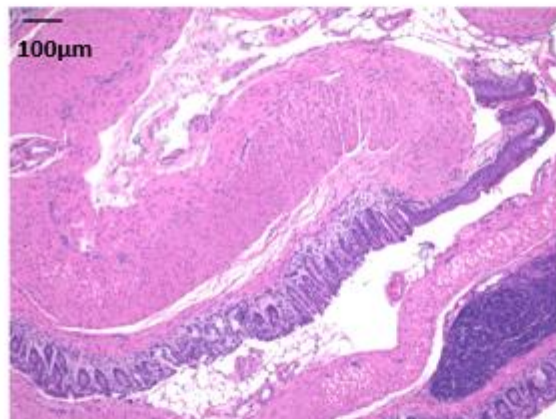

Rectum

B

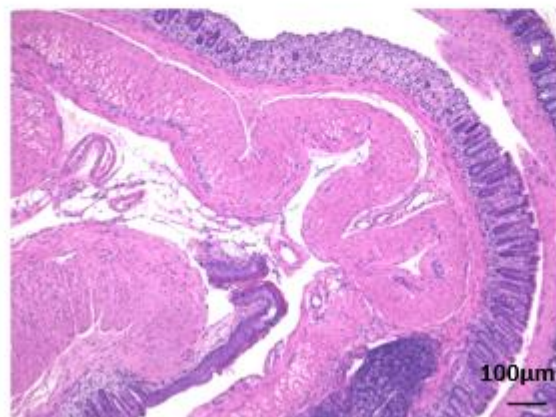

Distal colon
