# Supplementary material
Source: MDPI journal article supplement (https://www.mdpi.com/1424-8247/16/4/618)

Supplementary Figure S2. Principle of SBE reporter assay.

Once Smad 3/Smad 4 binds to SBE together with various transcriptional factors, luciferase signal comes out.

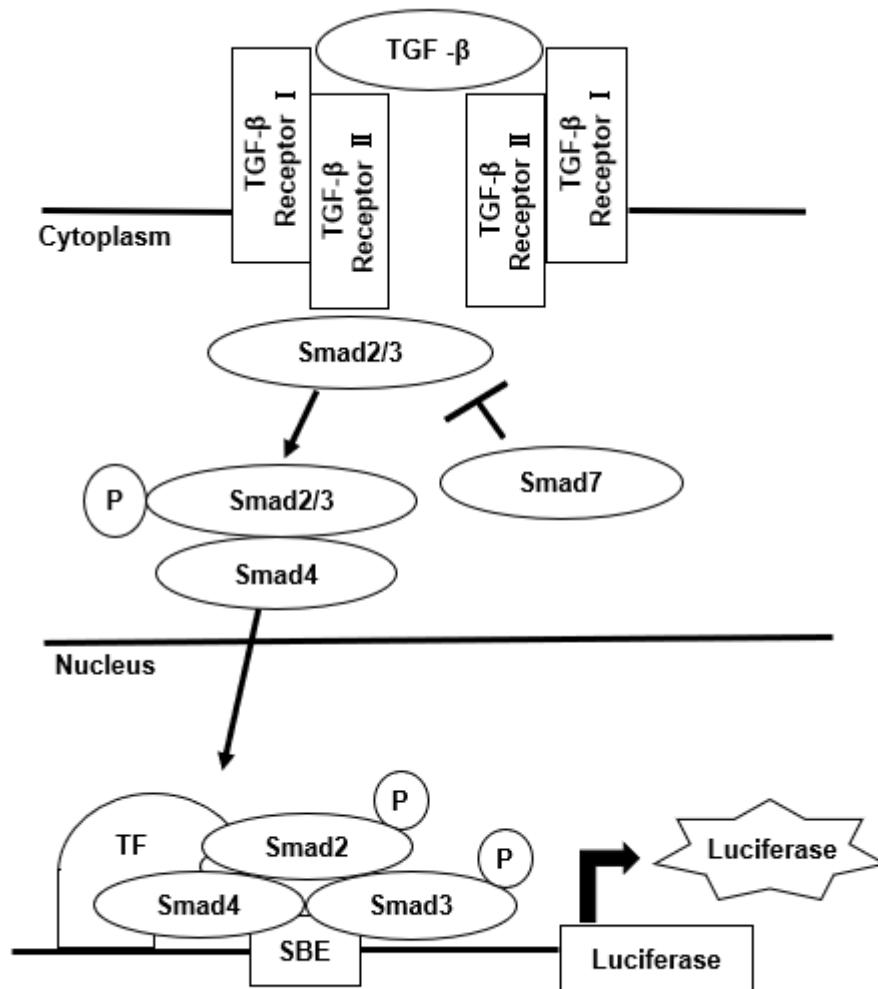

Supplement: s1 [file s1]
